# Supplementary material for: Physico-Chemical Changes Induced by Gamma Irradiation on Some Structural Protein Extracts
Source: MDPI journal article supplement (doi:10.3390/biom13050774), 2023-04-29
Supplement: s1 [file s1]

## *Supplementary Material*

# **Physico-Chemical Changes Induced by Gamma Irradiation on Some Structural Protein Extracts**

**Maria Stanca <sup>1</sup>, Carmen Gaidau <sup>1</sup>, Traian Zaharescu <sup>2</sup>, George-Alin Balan <sup>3</sup>, Iulia Matei <sup>3</sup>, Aurica Precupas <sup>3</sup>, Anca Ruxandra Leonties <sup>3</sup> and Gabriela Ionita <sup>1,3,\*</sup>**

<sup>1</sup> Leather Research Department, Research and Development National Institute for Textiles and Leather-Division Leather and Footwear Research Institute, 93, Ion Minulescu Street, 031215 Bucharest, Romania

<sup>2</sup> INCDIE ICPE CA, 313 Splaiul Unirii, P.O. Box 149, 030138 Bucharest, Romania

<sup>3</sup> "Ilie Murgulescu" Institute of Physical Chemistry of the Romanian Academy, 202 Splaiul Independentei, 060021 Bucharest, Romania

\* Correspondence: gabi2ionita@yahoo.com or ige@icf.ro

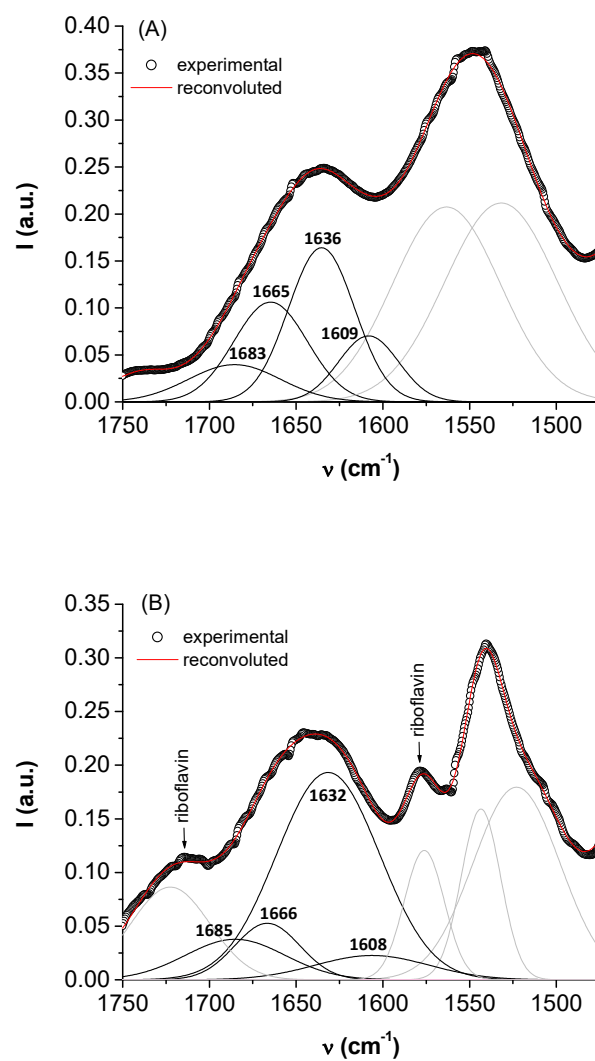

**Figure S1.** Deconvolution of the amide I region of the IR spectra of (A) collagen, (B) collagen/riboflavin/irradiated; for clarity, band components not belonging to the region of interest are depicted in grey.

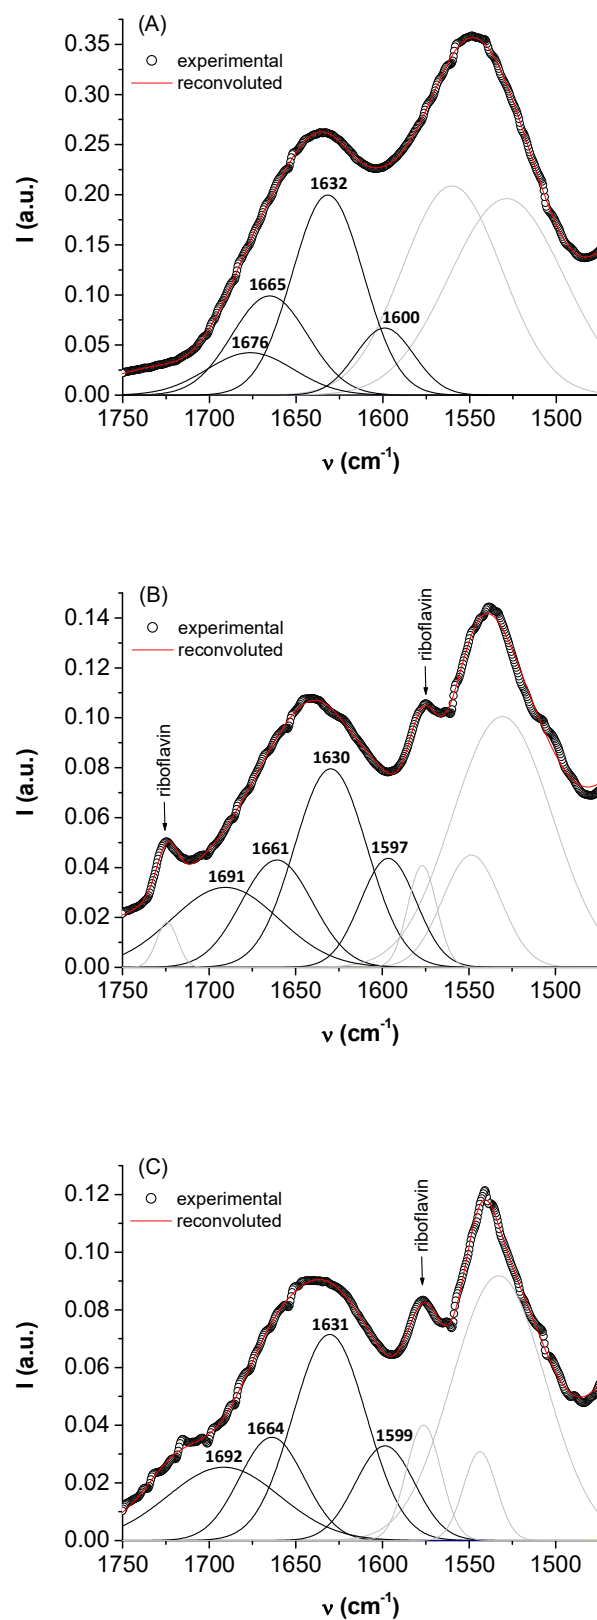

**Figure S2.** Deconvolution of the amide I region of the IR spectra of (A) bovine gelatin, (B) bovine gelatin/riboflavin, (C) bovine gelatin/riboflavin/gamma irradiated; for clarity, band components not belonging to the region of interest are depicted in grey.

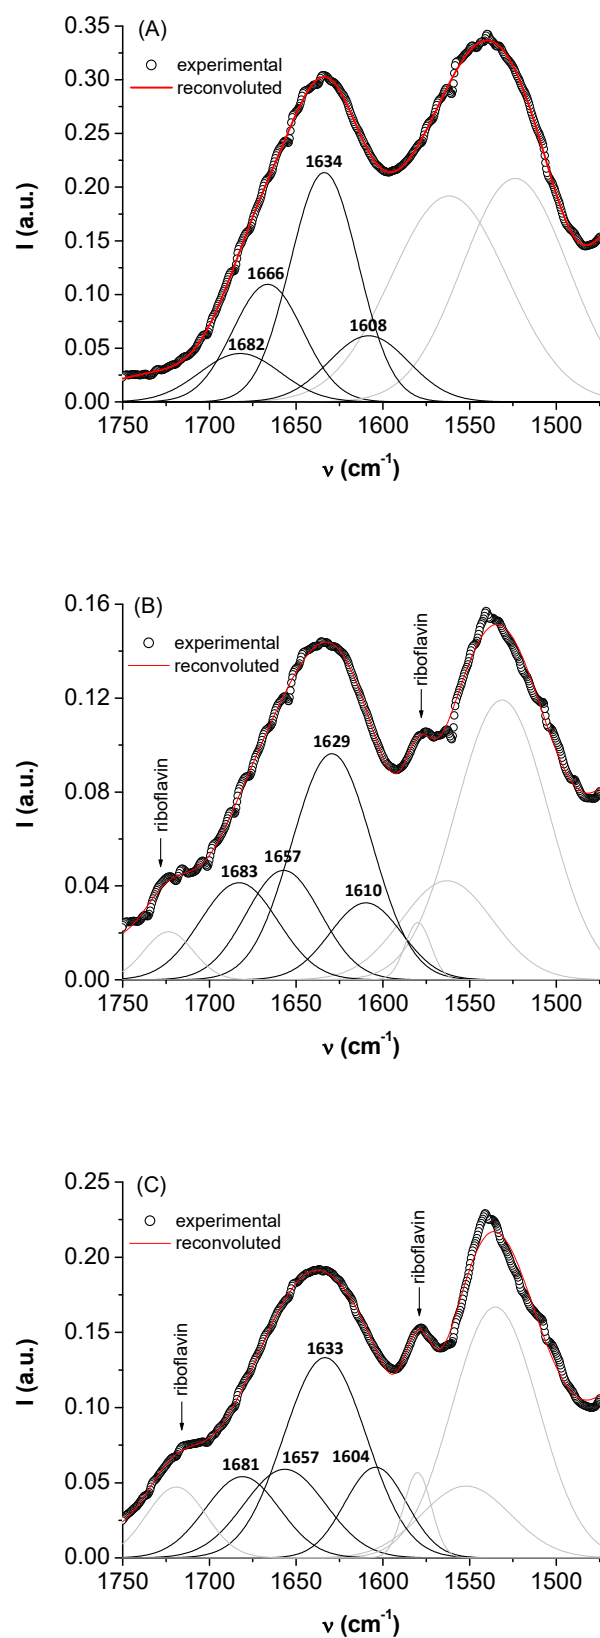

**Figure S3.** Deconvolution of the amide I region of the IR spectra of (A) fish gelatin, (B) fish gelatin/riboflavin, (C) fish gelatin/riboflavin gamma irradiated; for clarity, band components not belonging to the region of interest are depicted in grey.

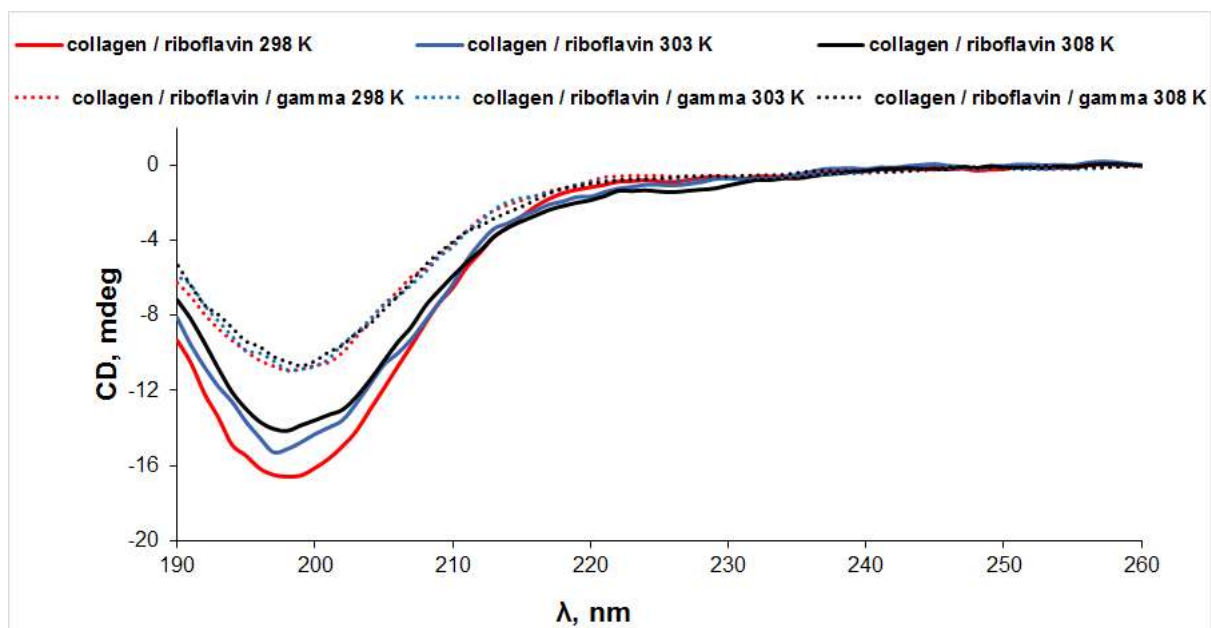

**Figure S4.** The CD spectra of collagen/riboflavin (line) and collagen/riboflavin/gamma irradiated (dotted line) solutions in acetic acid 0.18 M at different temperatures.

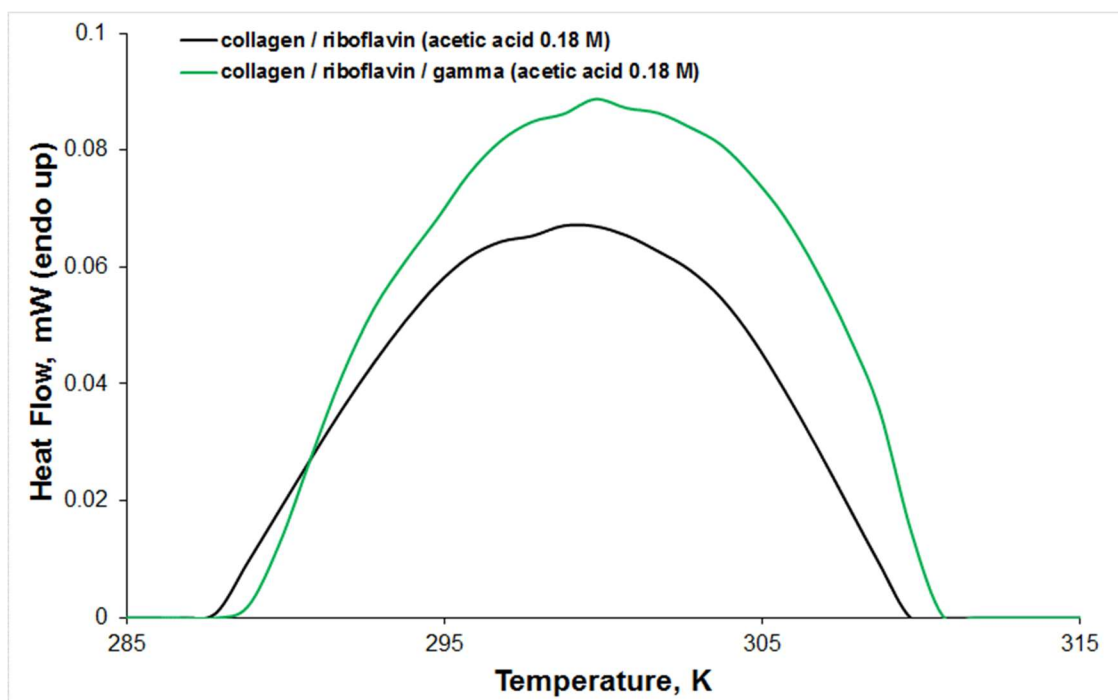

**Figure S5.** The  $\mu$ DSC signal for the thermal denaturation of collagen/riboflavin solution in acetic acid 0.18 M, prior to and after gamma irradiation.

**Table S1.** Assignment of the main IR bands of collagen.

| Sample                    | Wavenumber<br>(cm <sup>-1</sup> ) | Assignment                             |
|---------------------------|-----------------------------------|----------------------------------------|
| collagen                  | 3290, 3076 (w)                    | O-H, N-H stretching (amide A and B)    |
|                           | 2958 (w), 2923, 2873 (w), 2852    | C-H stretching (asymmetric, symmetric) |
|                           | 1636 (s)                          | C=O stretching/N-H bending (amide I)   |
|                           | 1547 (s)                          | C-N stretching/N-H bending (amide II)  |
|                           | 1446, 1408 (s)                    | C-H bending                            |
|                           | 1344, 1242                        | C-N stretching/N-H bending (amide III) |
|                           | 1080, 1050, 1020                  | C-O stretching (glycated collagen)     |
| collagen/riboflavin       | 3300, 3072 (w)                    | O-H, N-H stretching (amide A and B)    |
|                           | 2927, 2854                        | C-H stretching (asymmetric, symmetric) |
|                           | 1645 (w)                          | C=O stretching/N-H bending (amide I)   |
|                           | 1538 (s)                          | C-N stretching/N-H bending (amide II)  |
|                           | 1445, 1407 (s)                    | C-H bending                            |
|                           | 1343, 1240                        | C-N stretching/N-H bending (amide III) |
|                           | 1086, 1052, 1021                  | C-O stretching (glycated collagen)     |
| collagen/riboflavin/gamma | 3290, 3069                        | O-H, N-H stretching (amide A and B)    |
|                           | 2954, 2919 (s), 2972, 2851 (s)    | C-H stretching (asymmetric, symmetric) |
|                           | 1642 (s)                          | C=O stretching/N-H bending (amide I)   |
|                           | 1540 (s)                          | C-N stretching/N-H bending (amide II)  |
|                           | 1404 (w)                          | C-H bending                            |
|                           | 1245                              | C-N stretching/N-H bending (amide III) |
|                           | 1077, 1060, 1028                  | C-O stretching (glycated collagen)     |

Abbreviations: s – strong, w – weak.

**Table S2.** Assignment of the main IR bands of bovine gelatin.

| Sample                          | Wavenumber<br>(cm <sup>-1</sup> )      | Assignment                             |
|---------------------------------|----------------------------------------|----------------------------------------|
| bovine gelatin                  | 3300, 3071                             | O-H, N-H stretching (amide A and B)    |
|                                 | 2960 (w), 2928, 2875 (w), 2851 (w)     | C-H stretching (asymmetric, symmetric) |
|                                 | 1635 (s)                               | C=O stretching/N-H bending (amide I)   |
|                                 | 1549 (s)                               | C-N stretching/N-H bending (amide II)  |
|                                 | 1448 (w), 1409                         | C-H bending                            |
|                                 | 1343, 1243                             | C-N stretching/N-H bending (amide III) |
|                                 | 1080, 1050, 1021                       | C-O stretching (glycated gelatin)      |
| bovine gelatin/riboflavin       | 3276, 3069                             | O-H, N-H stretching (amide A and B)    |
|                                 | 2931 (w), 2876 (w)                     | C-H stretching (asymmetric, symmetric) |
|                                 | 1642 (s)                               | C=O stretching/N-H bending (amide I)   |
|                                 | 1538 (s)                               | C-N stretching/N-H bending (amide II)  |
|                                 | 1454 (w), 1409                         | C-H bending                            |
|                                 | 1343, 1251                             | C-N stretching/N-H bending (amide III) |
|                                 | 1081; 1021                             | C-O stretching (glycated gelatin)      |
| bovine gelatin/riboflavin/gamma | 3300, 3068                             | O-H, N-H stretching (amide A and B)    |
|                                 | 2955 (w), 2918 (s), 2873 (w), 2849 (s) | C-H stretching (asymmetric, symmetric) |
|                                 | 1638 (s)                               | C=O stretching/N-H bending (amide I)   |
|                                 | 1541 (s)                               | C-N stretching/N-H bending (amide II)  |
|                                 | 1448 (w), 1404 (w)                     | C-H bending                            |
|                                 | 1350; 1246                             | C-N stretching/N-H bending (amide III) |
|                                 | 1061, 1031                             | C-O stretching (glycated gelatin)      |

Abbreviations: s – strong, w – weak.

**Table S3.** Assignment of the main IR bands of fish gelatin.

| Sample                        | Wavenumber<br>(cm <sup>-1</sup> )  | Assignment                             |
|-------------------------------|------------------------------------|----------------------------------------|
| fish gelatin                  | 3275, 3076                         | O-H, N-H stretching (amide A and B)    |
|                               | 2960 (w), 2933, 2877 (w), 2852 (w) | C-H stretching (asymmetric, symmetric) |
|                               | 1635 (s)                           | C=O stretching/N-H bending (amide I)   |
|                               | 1540 (s)                           | C-N stretching/N-H bending (amide II)  |
|                               | 1446, 1406 (s)                     | C-H bending                            |
|                               | 1338, 1243                         | C-N stretching/N-H bending (amide III) |
|                               | 1080, 1050, 1024                   | C-O stretching (glycated gelatin)      |
| fish gelatin/riboflavin       | 3279, 3070                         | O-H, N-H stretching (amide A and B)    |
|                               | 2934, 2877 (w)                     | C-H stretching (asymmetric, symmetric) |
|                               | 1634 (s)                           | C=O stretching/N-H bending (amide I)   |
|                               | 1538 (s)                           | C-N stretching/N-H bending (amide II)  |
|                               | 1452, 1401                         | C-H bending                            |
|                               | 1343, 1247                         | C-N stretching/N-H bending (amide III) |
|                               | 1079, 1061, 1029                   | C-O stretching (glycated gelatin)      |
| fish gelatin/riboflavin/gamma | 3283, 3068                         | O-H, N-H stretching (amide A and B)    |
|                               | 2955, 2918 (s), 2872, 2851 (s)     | C-H stretching (asymmetric, symmetric) |
|                               | 1638 (s)                           | C=O stretching/N-H bending (amide I)   |
|                               | 1539 (s)                           | C-N stretching/N-H bending (amide II)  |
|                               | 1444, 1403                         | C-H bending                            |
|                               | 1347, 1245                         | C-N stretching/N-H bending (amide III) |
|                               | 1077, 1057, 1028                   | C-O stretching (glycated gelatin)      |

Abbreviations: s – strong, w – weak.

**Table S4.** Secondary structure content of collagen samples.

| Sample                    | Band Assignment | $\nu$ (cm <sup>-1</sup> ) | % Area |
|---------------------------|-----------------|---------------------------|--------|
| collagen                  | $\beta$ -sheet  | 1609                      | 15     |
|                           | random coil     | 1636                      | 41     |
|                           | $\alpha$ -helix | 1665                      | 30     |
|                           | $\beta$ -turn   | 1683                      | 14     |
| collagen/riboflavin/gamma | $\beta$ -sheet  | 1608                      | 8      |
|                           | random coil     | 1632                      | 68     |
|                           | $\alpha$ -helix | 1666                      | 12     |
|                           | $\beta$ -turn   | 1685                      | 12     |

**Table S5.** Secondary structure content of bovine gelatin samples.

| Sample                          | Band Assignment | $\nu$ (cm <sup>-1</sup> ) | % Area |
|---------------------------------|-----------------|---------------------------|--------|
| bovine gelatin                  | $\beta$ -sheet  | 1600                      | 13     |
|                                 | random coil     | 1632                      | 48     |
|                                 | $\alpha$ -helix | 1665                      | 26     |
|                                 | $\beta$ -turn   | 1676                      | 13     |
| bovine gelatin/riboflavin       | $\beta$ -sheet  | 1597                      | 17     |
|                                 | random coil     | 1630                      | 40     |
|                                 | $\alpha$ -helix | 1661                      | 21     |
|                                 | $\beta$ -turn   | 1691                      | 22     |
| bovine gelatin/riboflavin/gamma | $\beta$ -sheet  | 1599                      | 16     |
|                                 | random coil     | 1631                      | 43     |
|                                 | $\alpha$ -helix | 1664                      | 19     |
|                                 | $\beta$ -turn   | 1692                      | 23     |

**Table S6.** Secondary structure content of fish gelatin samples.

| Sample                        | Band Assignment | $\nu$ (cm <sup>-1</sup> ) | % Area |
|-------------------------------|-----------------|---------------------------|--------|
| fish gelatin                  | $\beta$ -sheet  | 1608                      | 16     |
|                               | random coil     | 1634                      | 47     |
|                               | $\alpha$ -helix | 1666                      | 25     |
|                               | $\beta$ -turn   | 1682                      | 12     |
| fish gelatin/riboflavin       | $\beta$ -sheet  | 1610                      | 14     |
|                               | random coil     | 1629                      | 46     |
|                               | $\alpha$ -helix | 1657                      | 21     |
|                               | $\beta$ -turn   | 1683                      | 19     |
| fish gelatin/riboflavin/gamma | $\beta$ -sheet  | 1604                      | 16     |
|                               | random coil     | 1633                      | 47     |
|                               | $\alpha$ -helix | 1657                      | 20     |
|                               | $\beta$ -turn   | 1681                      | 17     |

**Table S7.** Peak temperature and denaturation enthalpy change obtained from  $\mu$ DSC measurements for solutions prepared in acetic acid 15.7 M.

| <b>Sample</b>                   | <b>T<sub>peak</sub> (K)</b> | <b><math>\Delta H</math> (J/g)</b> |
|---------------------------------|-----------------------------|------------------------------------|
| keratin                         | 300.75                      | 1.12                               |
| keratin/riboflavin/gamma        | 300.79                      | 0.95                               |
| collagen                        | 303.84                      | 2.56                               |
| collagen/riboflavin/gamma       | 298.07                      | 0.21                               |
| bovine gelatin                  | 302.64                      | 2.43                               |
| bovine gelatin/riboflavin/gamma | 301.45                      | 1.19                               |
| fish gelatin                    | 303.64                      | 2.14                               |
| fish gelatin/riboflavin/gamma   | 303.14                      | 0.75                               |

**Table S8.** Parameters of the DMPO and PBN spin adducts formed in protein/riboflavin solutions after exposure to gamma radiation.

| <b>Sample</b>             | <b>DMPO</b>                  |                              |                              |                              | <b>PBN</b>                   |                              |                          |                          |
|---------------------------|------------------------------|------------------------------|------------------------------|------------------------------|------------------------------|------------------------------|--------------------------|--------------------------|
|                           | <b>1 hour</b>                |                              | <b>2 hours</b>               |                              | <b>1 hour</b>                |                              | <b>2 hours</b>           |                          |
|                           | <b>a<sub>N</sub><br/>(G)</b> | <b>a<sub>H</sub><br/>(G)</b> | <b>a<sub>N</sub><br/>(G)</b> | <b>a<sub>H</sub><br/>(G)</b> | <b>a<sub>N</sub><br/>(G)</b> | <b>a<sub>H</sub><br/>(G)</b> | <b>a<sub>N</sub> (G)</b> | <b>a<sub>H</sub> (G)</b> |
| <b>keratin</b>            | -                            | -                            | 15.00                        | 14.73                        | -                            | -                            | -                        | -                        |
| <b>collagen</b>           | 14.80                        | 13.97                        | 14.80                        | 14.04                        | 14.70                        | 2.76                         | 14.85                    | 3.15                     |
| <b>bovine<br/>gelatin</b> | 14.75                        | 13.86                        | 14.75                        | 13.90                        | 14.61                        | 2.56                         | 14.75                    | 2.95                     |
| <b>fish gelatin</b>       | 14.70                        | 13.80                        | 14.75                        | 13.95                        | 14.55                        | 2.50                         | 14.65                    | 2.60                     |
